# Supplementary material
Source: publisher figshare collection journal article supplement (https://acs.figshare.com/ndownloader/files/5123578)
Supplement: Supplementary file 1 [file 5123578]

## **A DNA-based biosensor for monitoring pH *in vitro* and in living cells**

Tatsuo Ohmichi<sup>‡ §</sup>, Yasunori Kawamoto<sup>||</sup>, Peng Wu<sup>⊥</sup>, Daisuke Miyoshi<sup>‡</sup>, Hisae Karimata<sup>||</sup>, and Naoki Sugimoto<sup>\* ‡ ||</sup>

<sup>‡</sup>Frontier Institute for Biomolecular Engineering Research (FIBER), Konan University,  
8-9-1 Okamoto, Higashinada-ku, Kobe 658-8501, Japan

<sup>§</sup>I.S.T Corporation, 13-13-5 Ichiriyama, Otsu 520-2153, Japan

<sup>||</sup>Department of Chemistry, Faculty of Science and Engineering, Konan University, 8-9-1  
Okamoto, Higashinada-ku, Kobe 658-8501, Japan

<sup>⊥</sup>High Technology Research Center, Konan University, 8-9-1 Okamoto, Higashinada-ku,  
Kobe 658-8501, Japan

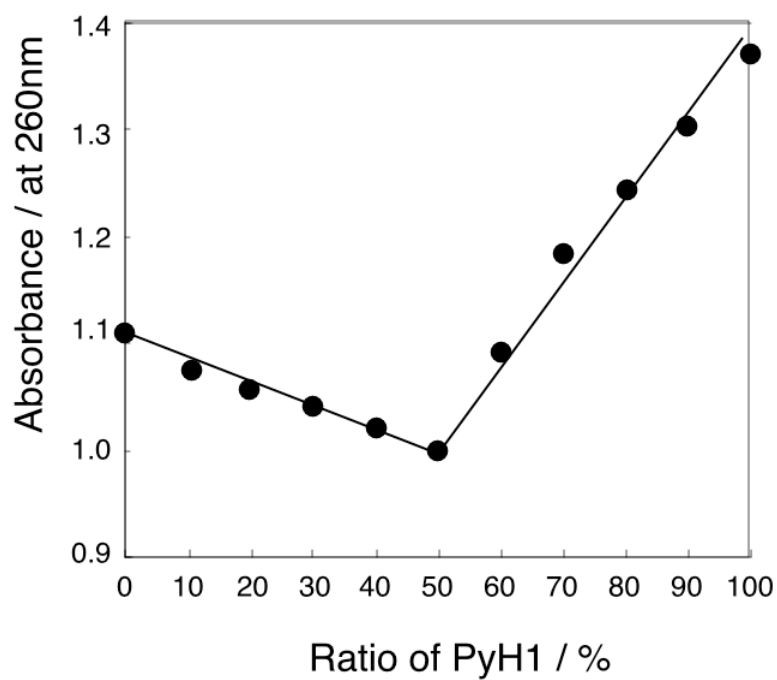

**Figure S1.** Mixing curve of (5'-TCTTTCTCTTCT-3' (PyH1) / 5'-AGAAAGAGAAGA-3' (PuC1)) in 100 mM Na<sup>+</sup> and 50 mM Tris-acetate buffer (pH 5.0) at 1 °C.

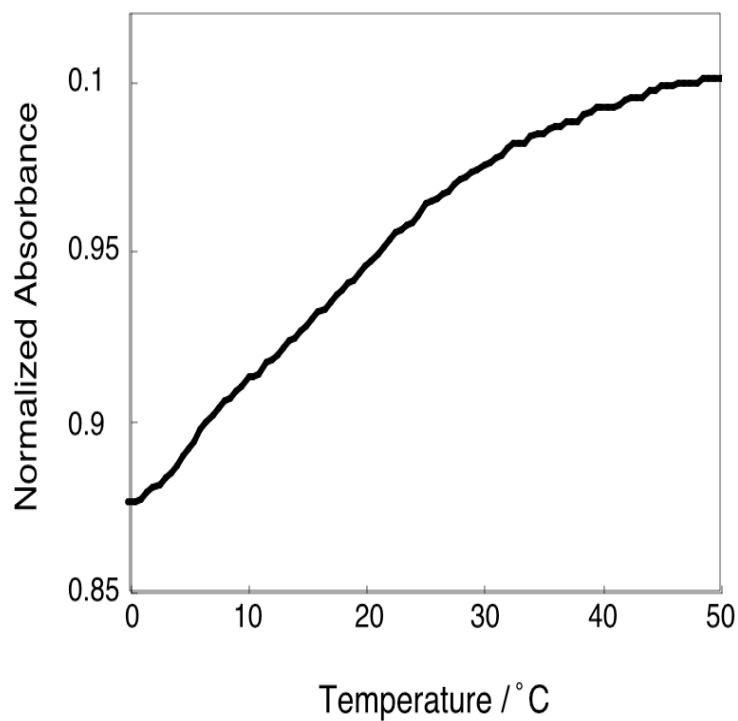

**Figure S2.** Normalized melting curve of 24 mer 5'-TCTTTCTCTTCT-3'-3'-TTTT-AGAAGAGAAAGA- 5' in 100 mM Na<sup>+</sup> and 50 mM Tris-HCl (9.0) buffer. The total DNA concentration was 3  $\mu$ M.

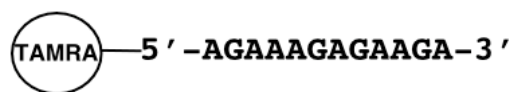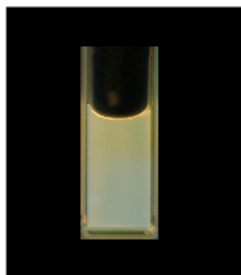

**Figure S3.** Photograph of the fluorescence of TAMRA-conjugated control DNA in 100 mM Na<sup>+</sup> and 50 mM Tris-acetate buffer (pH 5.0).

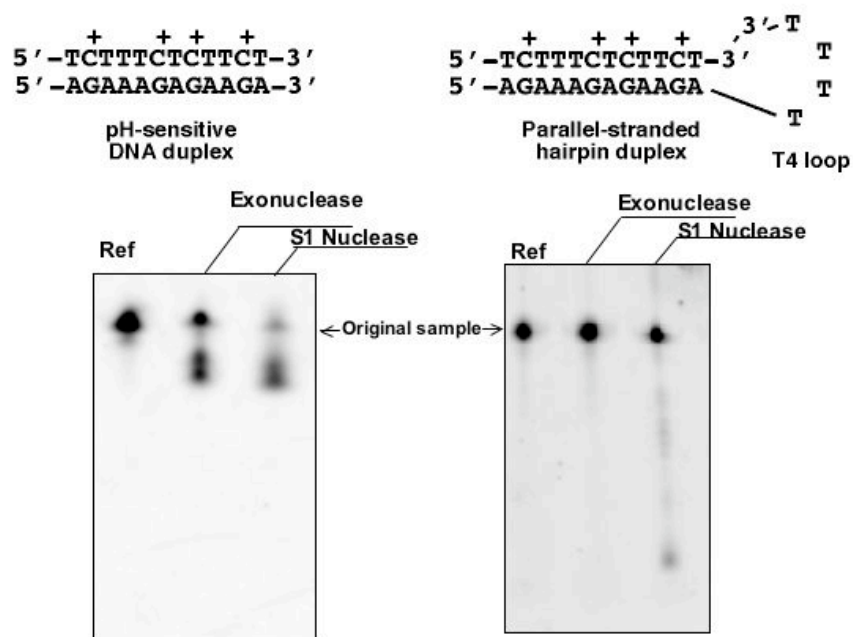

**Figure S4.** Nuclease resistance of the intermolecular and intramolecular DNA oligonucleotides. DNA oligonucleotides were incubated at 37 °C for 1 h with 1 unit Exonuclease or S1 nuclease. The total DNA concentration was 2  $\mu$ M.
